# Supplementary material for: Age-Based Causes and Clinical Characteristics of Immediate-Type Food Allergy in Korean Children
Source: PubMed Central journal article supplement — Allergy Asthma Immunol Res. 2017 Jul 3;9(5):423–30. doi: 10.4168/aair.2017.9.5.423 (PMC5500697; doi:10.4168/aair.2017.9.5.423), 2017-07-03
Supplement: aair-9-423-s002.pdf [file aair-9-423-s002.pdf]

**Supplementary Table 1.** Top 10 causative foods of 8 leading hospitals

| Top 10 causes of 8 leading hospitals | Hosp 1     |            | Hosp 2     |            | Hosp 3     |           | Hosp 4     |           | Hosp 5     |           | Hosp 6     |           | Hosp 7     |           | Hosp 8     |           |
|--------------------------------------|------------|------------|------------|------------|------------|-----------|------------|-----------|------------|-----------|------------|-----------|------------|-----------|------------|-----------|
|                                      | Causes     | N (%)      | Causes     | N (%)      | Causes     | N (%)     | Causes     | N (%)     | Causes     | N (%)     | Causes     | N (%)     | Causes     | N (%)     | Causes     | N (%)     |
| 1                                    | Hen's egg  | 130 (27.1) | Cow's milk | 115 (28.9) | Cow's milk | 93 (33.1) | Hens' egg  | 31 (33.7) | Cow's milk | 13 (17.1) | Cow's milk | 25 (36.8) | Cow's milk | 25 (39.1) | Hen's egg  | 25 (39.7) |
| 2                                    | Cow's milk | 121 (25.3) | Hen's egg  | 113 (28.4) | Hen's egg  | 57 (20.3) | Cow's milk | 28 (30.4) | Hen's egg  | 10 (13.2) | Hen's egg  | 21 (30.9) | Hen's egg  | 14 (21.9) | Cow's milk | 12 (19.0) |
| 3                                    | Wheat      | 51 (10.6)  | Wheat      | 36 (9.0)   | Wheat      | 23 (8.2)  | Walnut     | 12 (13.0) | Shrimp     | 5 (6.6)   | Walnut     | 8 (11.8)  | Walnut     | 6 (9.4)   | Wheat      | 5 (7.9)   |
| 4                                    | Walnut     | 39 (8.1)   | Walnut     | 23 (5.8)   | Walnut     | 21 (7.5)  | Peanut     | 5 (5.4)   | Pork       | 5 (6.6)   | Wheat      | 2 (2.9)   | Wheat      | 6 (9.4)   | Walnut     | 4 (6.3)   |
| 5                                    | Peanut     | 36 (7.5)   | Peanut     | 16 (4.0)   | Peanut     | 15 (5.3)  | Wheat      | 4 (4.3)   | Apple      | 4 (5.3)   | Rice       | 2 (2.9)   | Peanut     | 5 (7.8)   | Peanut     | 4 (6.3)   |
| 6                                    | Soybean    | 11 (2.3)   | Almond     | 11 (2.8)   | Shrimp     | 9 (3.2)   | Soybean    | 2 (2.2)   | Walnut     | 3 (3.9)   | Peanut     | 1 (1.5)   | Buckwheat  | 1 (1.6)   | Kiwi       | 3 (4.8)   |
| 7                                    | Pine nut   | 11 (2.3)   | Pine nut   | 9 (2.3)    | Soybean    | 8 (2.8)   | Shrimp     | 2 (2.2)   | Kiwi       | 3 (3.9)   | Buckwheat  | 1 (1.5)   | Crab       | 1 (1.6)   | Buckwheat  | 2 (3.2)   |
| 8                                    | Buckwheat  | 7 (1.5)    | Buckwheat  | 9 (2.3)    | Almond     | 5 (1.8)   | Buckwheat  | 1 (1.1)   | Peanut     | 2 (2.6)   | Peach      | 1 (1.5)   | Kiwi       | 1 (1.6)   | Almond     | 2 (3.2)   |
| 9                                    | Shrimp     | 6 (1.3)    | Kiwi       | 7 (1.8)    | Buckwheat  | 4 (1.4)   | Almond     | 1 (1.1)   | Crab       | 2 (2.6)   | Beef       | 1 (1.5)   | Apple      | 1 (1.6)   | Pine nut   | 1 (1.6)   |
| 10                                   | Kiwi       | 5 (1.0)    | Shrimp     | 6 (1.5)    | Crab       | 4 (1.4)   | Pine nut   | 1 (1.1)   | Pistachio  | 2 (2.6)   | Pork       | 1 (1.5)   | Pork       | 1 (1.6)   | -          | -         |
| Total N                              | 479        |            | 398        |            | 281        |           | 92         |           | 76         |           | 68         |           | 64         |           | 63         |           |
| Median Age (m)                       | 24         |            | 12         |            | 13         |           | 12         |           | 33         |           | 8.5        |           | 12         |           | 12         |           |
