# Supplementary material for: Age-Based Causes and Clinical Characteristics of Immediate-Type Food Allergy in Korean Children
Source: PubMed Central journal article supplement — Allergy Asthma Immunol Res. 2017 Jul 3;9(5):423–30. doi: 10.4168/aair.2017.9.5.423 (PMC5500697; doi:10.4168/aair.2017.9.5.423), 2017-07-03
Supplement: aair-9-423-s003.pdf [file aair-9-423-s003.pdf]

**Supplementary Table 2.** Demographic profiles of cases with and without information for places of FA occurrence

|                       | Place of occurrence record (+) | Place of occurrence record (-) | <i>P</i> value     |
|-----------------------|--------------------------------|--------------------------------|--------------------|
| Total number of cases | 901                            | 760                            | -                  |
| Median age            | 13 months                      | 13 months                      | 0.558 <sup>α</sup> |
| Male, n (%)           | 582 (64.6)                     | 468 (61.6)                     | 0.204 <sup>β</sup> |

<sup>α</sup>Mann-Whitney test; <sup>β</sup>Chi-square test.
