# Supplementary material for: Age-Based Causes and Clinical Characteristics of Immediate-Type Food Allergy in Korean Children
Source: PubMed Central journal article supplement — Allergy Asthma Immunol Res. 2017 Jul 3;9(5):423–30. doi: 10.4168/aair.2017.9.5.423 (PMC5500697; doi:10.4168/aair.2017.9.5.423), 2017-07-03
Supplement: aair-9-423-s004.pdf [file aair-9-423-s004.pdf]

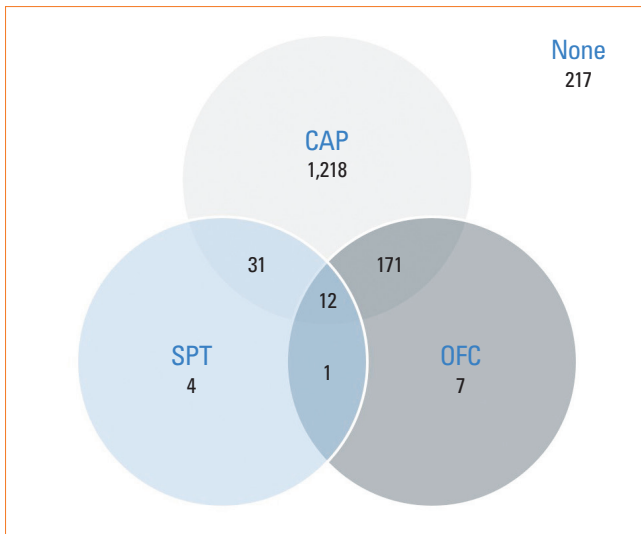

**Supplementary Fig. 2.** The number of cases of serum specific IgE, skin prick test, and oral food challenges performed.
